# Supplementary material for: Transcriptomic and Genetic Analyses Identify the Krüppel-Like Factor Dar1 as a New Regulator of Tube-Shaped Long Tendon Development
Source: PubMed Central journal article supplement (PMC8716952; doi:10.3389/fcell.2021.747563), 2021-12-16
Supplement: Table1.pdf [file Table1.pdf]

| Flybase ID  | Gene names    | Observed phenotype                                                                             |
|-------------|---------------|------------------------------------------------------------------------------------------------|
| FBgn0001316 | klar          | no observed phenotype                                                                          |
| FBgn0085044 | mew/PS1*      | occasional tendon shortening/locomotion defect                                                 |
| FBgn0000308 | chic          | lethality at early pupal stage                                                                 |
| FBgn0010333 | Rac1*         | strong larval lethality (UAS-rac1 DN), clusters of tendon cells disorganized                   |
| FBgn0014010 | Rab5*         | strong larval lethality (UAS-rab5 DN), clusters of tendon cells disorganized                   |
| FBgn0022238 | lolal         | locomotion defect, excessive tendon elongation                                                 |
| FBgn0267348 | LanB2         | no observed phenotype                                                                          |
| FBgn0261341 | Verm          | pupal lethality, excessive tendon elongation                                                   |
| FBgn0260653 | Serp          | locomotion defect, excessive tendon elongation                                                 |
| FBgn0085148 | If (PS2)*     | pupal lethality, occasional tendon shortening                                                  |
| FBgn0004657 | Mys (betaPS)* | most flies die in pupae, escapers show strong locomotion defect with most leg tendon disrupted |

**Supplemental Table S1. List of tested genes involved in morphogenetic processes.**

UAS-RNAi lines for selected candidates or alternatively UAS-Dominant Negative line were crossed with *sr-gal4>UAS-Lifeact.GFP* and, when required, combined with *gal80ts* allele to by-pass embryonic lethality (genes with asterisk).
