# Supplementary material for: Transcriptomic and Genetic Analyses Identify the Krüppel-Like Factor Dar1 as a New Regulator of Tube-Shaped Long Tendon Development
Source: PubMed Central journal article supplement (PMC8716952; doi:10.3389/fcell.2021.747563), 2021-12-16
Supplement: Table2.pdf [file Table2.pdf]

| 1. Genes                   | 2. Flybase IDs | 3. library | 4. ID stock | 5. embryonic/early larval lethality (%) | 6. pupal lethality (%) | 7. % of flies showing climbing defect | 8. FPKM   | 9. Fold Changed (FC) |
|----------------------------|----------------|------------|-------------|-----------------------------------------|------------------------|---------------------------------------|-----------|----------------------|
| CG15435                    | FBgn0031608    | VDR        | 100074      | 0                                       | 10                     | 23,33                                 | 13,4316   | 1,52                 |
|                            |                | TRIP       | 65064       | 41                                      | 51                     | 53,33                                 |           |                      |
| CG3163*                    | FBgn0034961    | VDR        | 45767       | 18                                      | 0                      | <10%                                  | 29,1401   | 1,57                 |
| CG5641                     | FBgn0038046    | VDR        | 48200       | 0                                       | 5                      | <10%                                  | 126,366   | 1,65                 |
|                            |                | TRIP       | 56895       | 3                                       | 6                      | 11,11                                 |           |                      |
| CG6276                     | FBgn0038316    | VDR        | 30141       | 9                                       | 27                     | <10%                                  | 29,6684   | 1,56                 |
|                            |                | TRIP       | 27064       | 0                                       | 36                     | 50,00                                 |           |                      |
| CG9650                     | FBgn0029939    | TRIP       | 26713       | 0                                       | 22                     | 60                                    | 18,2011   | 1,6                  |
|                            |                | VDR        | 104402      | 0                                       | 0                      | 90,4                                  |           |                      |
| CG9948*                    | FBgn0035721    | VDR        | 29429       | 10                                      | 4                      | 40,00                                 | 16,4959   | 1,53                 |
| Dichaete                   | FBgn0000411    | VDR        | 107194      | 52                                      | 9,52                   | 33,33                                 | 17,5199   | 1,56                 |
|                            |                | TRIP       | 26217       | 10                                      | 19                     | 23                                    |           |                      |
| e(y)2                      | FBgn0000618    | VDR        | 16751       | 0                                       | 3                      | 20                                    | 40,8249   | 1,68                 |
|                            |                | TRIP       | 42524       | 26                                      | 40                     | 20,00                                 |           |                      |
| HP1c                       | FBgn0039019    | VDR        | 104893      | 4                                       | 11                     | <10%                                  | 118,756   | 1,55                 |
|                            |                | TRIP       | 31339       | 0                                       | 7                      | 20,00                                 |           |                      |
| ladybird early (lbe) / lbi | FBgn0011278    | VDR        | 12662       | 0                                       | 13                     | <10%                                  | 74,5073   | 1,51                 |
|                            |                | TRIP       | 60001       | 7                                       | 1                      | <10%                                  |           |                      |
| NF-YB                      | FBgn0032816    | VDR        | 103655      | 0                                       | 6                      | 30                                    | 32,1098   | 1,61                 |
|                            |                | TRIP       | 57254       | 0                                       | 10                     | 46,67                                 |           |                      |
| REPTOR-BP                  | FBgn0032202    | VDR        | 19110       | 3                                       | 8                      | 16,67                                 | 36,6661   | 1,65                 |
|                            |                | TRIP       | 29542       | 0                                       | 32                     | 36,67                                 |           |                      |
| sox15                      | FBgn0005613    | VDR        | 45482       | 2                                       | 15                     | 30,00                                 | 20,3571   | 1,65                 |
|                            |                | TRIP       | 57264       | 18                                      | 7                      | 50,00                                 |           |                      |
| CG17803                    | FBgn0038547    | VDR        | 38869       | 0                                       | 0                      | <10%                                  | 23,1472   | 3,71                 |
|                            |                | TRIP       | 60022       | 0                                       | 24,55                  | 3,33                                  |           |                      |
| drm                        | FBgn0024244    | VDR        | 1020405     | 0                                       | 45                     | 100,00                                | 405,8470  | 4,1                  |
|                            |                | TRIP       | 42548       | 0                                       | 1                      | <10%                                  |           |                      |
| E(spl)mgamma-HLH           | FBgn0002735    | VDR        | 10950       | 0                                       | 0                      | <10%                                  | 64,4192   | 2,11                 |
|                            |                | TRIP       | 25978       | 9                                       | 26,81                  | <10%                                  |           |                      |
| dar1                       | FBgn0263239    | VDR        | 26980       | 0                                       | 0                      | 73,30                                 | 33,5114   | 4,7                  |
|                            |                | TRIP       | 31987       | 0                                       | 62                     | 90,90                                 |           |                      |
| Dr*                        | FBgn0000492    | TRIP       | 42891       | 0                                       | 0                      | <10%                                  | 31,8571   |                      |
| odd                        | FBgn0002985    | VDR        | 102405      | 0                                       | 45                     | 100,00                                | 28,3636   | 2,42                 |
|                            |                | TRIP       | 28295       | 0                                       | 0                      | <10%                                  |           |                      |
| Sox14*                     | FBgn0005612    | TRIP       | 34794       | 0                                       | 0                      | <10%                                  | 27,9784   | 1,72                 |
| CG7785                     | FBgn0038564    | VDR        | 109307      | 0                                       | 27,64                  | 20                                    | 16,6135   | 1,8                  |
|                            |                | TRIP       | 57715       | 0                                       | 31                     | 46,70                                 |           |                      |
| CG11317*                   | FBgn0039816    | TRIP       | 28065       | 100                                     | nd                     | nd                                    | 16,2672   | 5,5                  |
|                            |                | VDR        | 11245       | 0                                       | 0                      | <10%                                  |           |                      |
| Dlpl1                      | FBgn0040467    | VDR        | 57717       | 48                                      | 1,67                   | 3,33                                  | 15,5048   | 1,91                 |
|                            |                | TRIP       | 2924        | 6                                       | 0                      | <10%                                  |           |                      |
| ato                        | FBgn0010433    | VDR        | 34929       | 0                                       | 8,27                   | 42,42                                 | 15,4854   | 5                    |
|                            |                | TRIP       | 2924        | 6                                       | 0                      | <10%                                  |           |                      |
| E(spl)m5-HLH               | FBgn0002631    | VDR        | 47124       | 18                                      | 14                     | <10%                                  | 14,1928   | 1,8                  |
|                            |                | TRIP       | 26201       | 0                                       | 0                      | <10%                                  |           |                      |
| toe*                       | FBgn0036285    | TRIP       | 50660       | 0                                       | 0                      | <10%                                  | 13,7040   | 2,28                 |
| CG44247*                   | FBgn0265182    | VDR        | 7413        | 0                                       | 0                      | <10%                                  | 13,5124   | 5,12                 |
| Sidpn*                     | FBgn0032741    | VDR        | 3065        | 0                                       | 0                      | <10%                                  | 12,6620   | 4,95                 |
| esg*                       | FBgn0001981    | TRIP       | 28514       | 18                                      | 28                     | 100,00                                | 101,44600 | 1,8                  |
|                            |                | VDR        | 108881      | 17                                      | 54,69                  | <10%                                  |           |                      |
| l(2)k10201                 | FBgn0016970    | VDR        | 57548       | 39                                      | 12                     | 13,33                                 | 10,262    | 2,1                  |
|                            |                | TRIP       | 57548       | 39                                      | 12                     | 13,33                                 |           |                      |
| Stripe                     | FBgn0003499    | VDR        | 105282      | 100                                     | nd                     | nd                                    | 54,4971   | 7,89                 |
|                            |                | TRIP       | 27701       | 100                                     | nd                     | nd                                    |           |                      |
| mCherry*                   |                | TRIP       | 35785       | 0                                       | 5                      | 15,00                                 | nd        | nd                   |

\* no alternative (VDR or TRIP) available stock

## Supplemental Table S2. List of the 31 analyzed transcription factors and RNAi screen data.

Columns 1 and 2 show gene names and Flybase IDs, respectively. Columns 3 and 4 show stock origin of tested UAS-RNAi lines and ID stock number, respectively. Column 5 shows the percentage of lethality in embryo or early larval stages induced by UAS-RNAi line expression using sr-gal4 driver. Crosses showing a lethality higher than the set threshold of 20% were considered positive. Column 6 shows the percentage of lethality during metamorphosis. Crosses showing metamorphosis lethality higher than 20% were considered as positive. Column 7 indicates the percentage of adult flies showing climbing defect. We set the threshold of 30% above which RNAi lines were considered positive. For a detailed description of lethality and climbing screen, see Materials and Methods. Columns 8 and 9 indicate transcript FPKM (Fragments Per Kilobase Million) and Fold Change expression in GFP+ cells compare to whole leg disc cells (p-value<0,05), respectively.
